# Supplementary material for: 2D metal–organic frameworks bearing butterfly-shaped metal-bis(dithiolene) linkers from dithiol-functionalized benzenedicarboxylic acid
Source: Royal Society of Chemistry journal article supplement (doi:10.1039/d4cc02282c), 2024-01-01

## checkCIF/PLATON report

Structure factors have been supplied for datablock(s) NiS4

THIS REPORT IS FOR GUIDANCE ONLY. IF USED AS PART OF A REVIEW PROCEDURE FOR PUBLICATION, IT SHOULD NOT REPLACE THE EXPERTISE OF AN EXPERIENCED CRYSTALLOGRAPHIC REFEREE.

No syntax errors found.      CIF dictionary      Interpreting this report

### Datablock: NiS4

---

|                      |                                             |                              |
|----------------------|---------------------------------------------|------------------------------|
| Bond precision:      | C-C = 0.0020 A                              | Wavelength=0.71073           |
| Cell:                | a=9.5425 (4)<br>alpha=90                    | b=26.947 (1)<br>beta=90      |
|                      |                                             | c=27.7314 (11)<br>gamma=90   |
| Temperature:         | 150 K                                       |                              |
|                      | Calculated                                  | Reported                     |
| Volume               | 7130.9 (5)                                  | 7130.9 (5)                   |
| Space group          | F d d d                                     | F d d d                      |
| Hall group           | -F 2uv 2vw                                  | -F 2uv 2vw                   |
| Moiety formula       | C16 H4 Ni O8 S4, 4 (C2 H7 N)<br>[+ solvent] | C16 H4 Ni O8 S4, 4 (C2 H7 N) |
| Sum formula          | C24 H32 N4 Ni O8 S4 [+<br>solvent]          | C24 H32 N4 Ni O8 S4          |
| Mr                   | 691.47                                      | 691.48                       |
| Dx, g cm-3           | 1.288                                       | 1.288                        |
| Z                    | 8                                           | 8                            |
| Mu (mm-1)            | 0.823                                       | 0.823                        |
| F000                 | 2880.0                                      | 2880.0                       |
| F000'                | 2887.76                                     |                              |
| h, k, lmax           | 13, 38, 39                                  | 13, 33, 34                   |
| Nref                 | 2799                                        | 2241                         |
| Tmin, Tmax           |                                             | 0.631, 1.000                 |
| Tmin'                |                                             |                              |
| Correction method= # | Reported T Limits: Tmin=0.631 Tmax=1.000    |                              |
| AbsCorr = MULTI-SCAN |                                             |                              |
| Data completeness=   | 0.801                                       | Theta (max)= 30.793          |

R(reflections)= 0.0322( 2011)

wR2(reflections)=  
0.1010( 2241)

S = 1.087

Npar= 97

The following ALERTS were generated. Each ALERT has the format

**test-name\_ALERT\_alert-type\_alert-level.**

Click on the hyperlinks for more details of the test.

### Alert level A

PLAT430\_ALERT\_2\_A Short Inter D...A Contact 0003 ..0003 . 2.46 Ang.  
3/4-x, 3/4-y, z = 2\_555 Check

**Author Response: The two O003 on benzenedicarboxyl moiety are twisted to each other that O003 and O003(3/4-x, 3/4-y,z) on adjacent molecule come closer and the distance between these two O003 was shortened to 2.46 angstrom to trigger this alert.**

### Alert level C

ABSTY02\_ALERT\_1\_C An \_exptl\_absorpt\_correction\_type has been given without  
a literature citation. This should be contained in the  
\_exptl\_absorpt\_process\_details field.

Absorption correction given as multi-scan

|                   |                                                  |              |
|-------------------|--------------------------------------------------|--------------|
| PLAT053_ALERT_1_C | Minimum Crystal Dimension Missing (or Error) ... | Please Check |
| PLAT054_ALERT_1_C | Medium Crystal Dimension Missing (or Error) ...  | Please Check |
| PLAT055_ALERT_1_C | Maximum Crystal Dimension Missing (or Error) ... | Please Check |
| PLAT244_ALERT_4_C | Low 'Solvent' Ueq as Compared to Neighbors of    | N007 Check   |
| PLAT250_ALERT_2_C | Large U3/U1 Ratio for <U(i,j)> Tensor(Resd 1)    | 2.1 Note     |
| PLAT975_ALERT_2_C | Check Calcd Resid. Dens. 0.88Ang From N007 .     | 0.60 eA-3    |
| PLAT975_ALERT_2_C | Check Calcd Resid. Dens. 0.95Ang From N007 .     | 0.57 eA-3    |
| PLAT976_ALERT_2_C | Check Calcd Resid. Dens. 0.95Ang From N007 .     | -0.62 eA-3   |
| PLAT977_ALERT_2_C | Check Negative Difference Density on H007 .      | -0.62 eA-3   |

### Alert level G

|                   |                                                  |             |
|-------------------|--------------------------------------------------|-------------|
| PLAT007_ALERT_5_G | Number of Unrefined Donor-H Atoms .....          | 1 Report    |
|                   | H007                                             |             |
| PLAT083_ALERT_2_G | SHELXL Second Parameter in WGHT Unusually Large  | 18.97 Why ? |
| PLAT232_ALERT_2_G | Hirshfeld Test Diff (M-X) Ni01 --S1 .            | 6.7 s.u.    |
| PLAT605_ALERT_4_G | Largest Solvent Accessible VOID in the Structure | 143 A**3    |
| PLAT720_ALERT_4_G | Number of Unusual/Non-Standard Labels .....      | 18 Note     |
|                   | Ni01 O003 O004 C005 C006 N007 H007 C008          |             |
|                   | C009 H009 C00A H00A H00B H00C C00B H00D          |             |
|                   | H00E H00F                                        |             |
| PLAT794_ALERT_5_G | Tentative Bond Valency for Ni01 (III) .          | 2.82 Info   |
| PLAT868_ALERT_4_G | ALERTS Due to the Use of _smbx_masks Suppressed  | ! Info      |
| PLAT912_ALERT_4_G | Missing # of FCF Reflections Above STh/L= 0.600  | 409 Note    |
| PLAT951_ALERT_5_G | Calculated (ThMax) and CIF-Reported Kmax Differ  | 5 Units     |
| PLAT952_ALERT_5_G | Calculated (ThMax) and CIF-Reported Lmax Differ. | 5 Units     |
| PLAT957_ALERT_1_G | Calculated (ThMax) and Actual (FCF) Kmax Differ  | 5 Units     |
| PLAT958_ALERT_1_G | Calculated (ThMax) and Actual (FCF) Lmax Differ. | 5 Units     |

PLAT969\_ALERT\_5\_G The 'Henn et al.' R-Factor-gap value ..... 4.90 Note  
 Predicted wR2: Based on SigI\*\*2 2.06 or SHELX Weight 9.50  
 PLAT978\_ALERT\_2\_G Number C-C Bonds with Positive Residual Density. 3 Info

---

1 **ALERT level A** = Most likely a serious problem - resolve or explain  
 0 **ALERT level B** = A potentially serious problem, consider carefully  
 10 **ALERT level C** = Check. Ensure it is not caused by an omission or oversight  
 14 **ALERT level G** = General information/check it is not something unexpected

6 ALERT type 1 CIF construction/syntax error, inconsistent or missing data  
 9 ALERT type 2 Indicator that the structure model may be wrong or deficient  
 0 ALERT type 3 Indicator that the structure quality may be low  
 5 ALERT type 4 Improvement, methodology, query or suggestion  
 5 ALERT type 5 Informative message, check

---

It is advisable to attempt to resolve as many as possible of the alerts in all categories. Often the minor alerts point to easily fixed oversights, errors and omissions in your CIF or refinement strategy, so attention to these fine details can be worthwhile. In order to resolve some of the more serious problems it may be necessary to carry out additional measurements or structure refinements. However, the purpose of your study may justify the reported deviations and the more serious of these should normally be commented upon in the discussion or experimental section of a paper or in the "special\_details" fields of the CIF. checkCIF was carefully designed to identify outliers and unusual parameters, but every test has its limitations and alerts that are not important in a particular case may appear. Conversely, the absence of alerts does not guarantee there are no aspects of the results needing attention. It is up to the individual to critically assess their own results and, if necessary, seek expert advice.

### Publication of your CIF in IUCr journals

A basic structural check has been run on your CIF. These basic checks will be run on all CIFs submitted for publication in IUCr journals (*Acta Crystallographica*, *Journal of Applied Crystallography*, *Journal of Synchrotron Radiation*); however, if you intend to submit to *Acta Crystallographica Section C* or *E* or *IUCrData*, you should make sure that full publication checks are run on the final version of your CIF prior to submission.

### Publication of your CIF in other journals

Please refer to the *Notes for Authors* of the relevant journal for any special instructions relating to CIF submission.

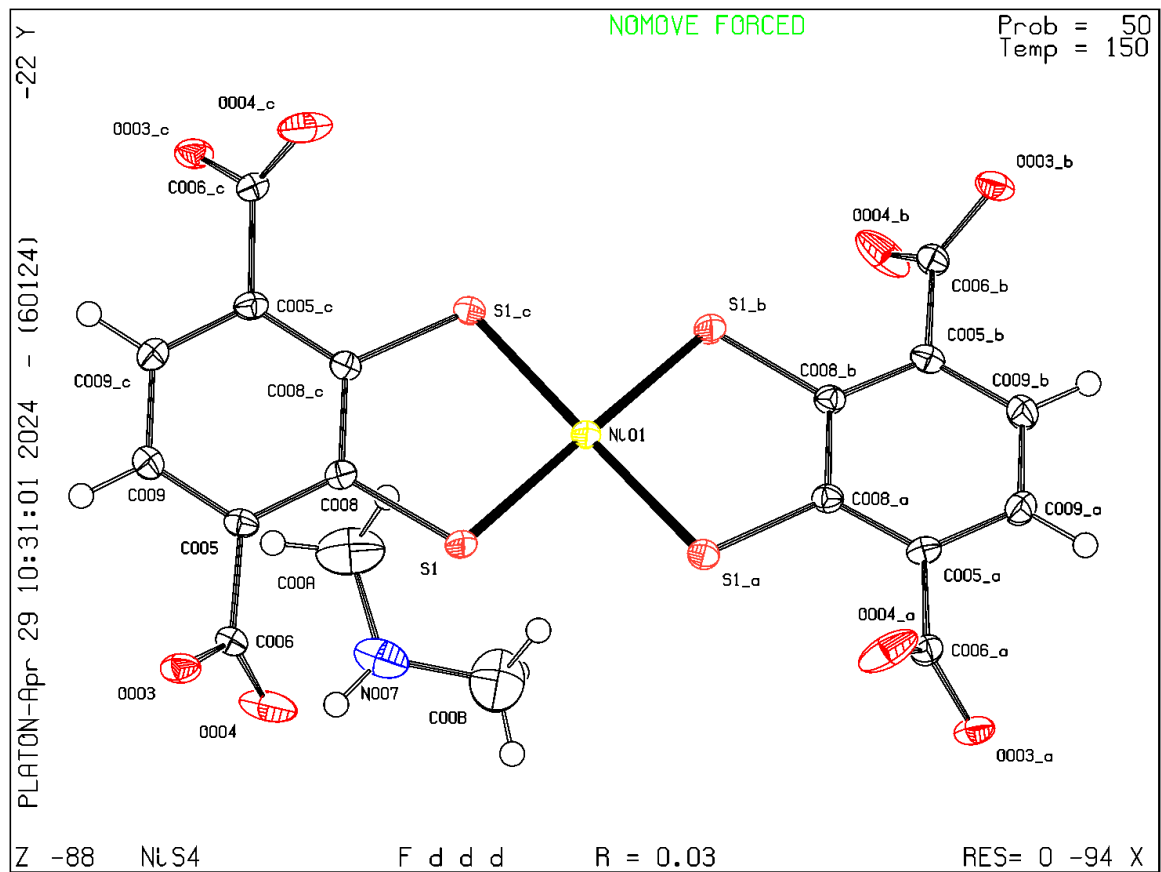

Supplement: d4cc02282c1.zip [file d4cc02282c1.zip]
