# Supplementary material for: 2D metal–organic frameworks bearing butterfly-shaped metal-bis(dithiolene) linkers from dithiol-functionalized benzenedicarboxylic acid
Source: Royal Society of Chemistry journal article supplement (doi:10.1039/d4cc02282c), 2024-01-01

## checkCIF/PLATON report

Structure factors have been supplied for datablock(s) Ni-dcbdt

THIS REPORT IS FOR GUIDANCE ONLY. IF USED AS PART OF A REVIEW PROCEDURE FOR PUBLICATION, IT SHOULD NOT REPLACE THE EXPERTISE OF AN EXPERIENCED CRYSTALLOGRAPHIC REFEREE.

No syntax errors found.      CIF dictionary      Interpreting this report

### Datablock: Ni-dcbdt

---

|                        |                                |                                |                          |
|------------------------|--------------------------------|--------------------------------|--------------------------|
| Bond precision:        | C-C = 0.0046 Å                 | Wavelength=1.54184             |                          |
| Cell:                  | a=22.0141(2)<br>alpha=90       | b=22.3831(3)<br>beta=90        | c=14.1276(1)<br>gamma=90 |
| Temperature:           | 293 K                          |                                |                          |
|                        | Calculated                     | Reported                       |                          |
| Volume                 | 6961.29(12)                    | 6961.29(12)                    |                          |
| Space group            | P b c n                        | P b c n                        |                          |
| Hall group             | -P 2n 2ab                      | -P 2n 2ab                      |                          |
| Moiety formula         | C16 H8 Ni2 O10 S4, 3(C4 H12 N) | C16 H8 Ni2 O10 S4, 3(C4 H12 N) |                          |
| Sum formula            | C28 H44 N3 Ni2 O10 S4          | C28 H45 N3 Ni2 O10 S4          |                          |
| Mr                     | 828.28                         | 829.33                         |                          |
| Dx, g cm <sup>-3</sup> | 1.581                          | 1.583                          |                          |
| Z                      | 8                              | 8                              |                          |
| Mu (mm <sup>-1</sup> ) | 4.080                          | 4.080                          |                          |
| F000                   | 3464.0                         | 3472.0                         |                          |
| F000'                  | 3434.91                        |                                |                          |
| h,k,lmax               | 27,28,17                       | 27,27,17                       |                          |
| Nref                   | 7447                           | 7278                           |                          |
| Tmin,Tmax              |                                | 0.305,1.000                    |                          |
| Tmin'                  |                                |                                |                          |

Correction method= # Reported T Limits: Tmin=0.305 Tmax=1.000  
AbsCorr = MULTI-SCAN

Data completeness= 0.977      Theta(max)= 77.964

R(reflections)= 0.0577( 6201)

wR2(reflections)=  
0.1632( 7278)

S = 1.052

Npar= 433

---

The following ALERTS were generated. Each ALERT has the format

**test-name\_ALERT\_alert-type\_alert-level.**

Click on the hyperlinks for more details of the test.

---

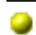

### Alert level C

|                   |                                                  |                |              |
|-------------------|--------------------------------------------------|----------------|--------------|
| PLAT041_ALERT_1_C | Calc. and Reported SumFormula                    | Strings Differ | Please Check |
|                   | Calc: C28 H44 N3 Ni2 O10 S4                      |                |              |
|                   | Rep.: C28 H45 N3 Ni2 O10 S4                      |                |              |
| PLAT043_ALERT_1_C | Calculated and Reported Mol. Weight Differ by .. | 1.05           | Check        |
| PLAT053_ALERT_1_C | Minimum Crystal Dimension Missing (or Error) ... | Please         | Check        |
| PLAT054_ALERT_1_C | Medium Crystal Dimension Missing (or Error) ...  | Please         | Check        |
| PLAT055_ALERT_1_C | Maximum Crystal Dimension Missing (or Error) ... | Please         | Check        |
| PLAT068_ALERT_1_C | Reported F000 Differs from Calcd (or Missing)... | Please         | Check        |
| PLAT094_ALERT_2_C | Ratio of Maximum / Minimum Residual Density .... | 2.13           | Report       |
| PLAT244_ALERT_4_C | Low 'Solvent' Ueq as Compared to Neighbors of    | N1             | Check        |
| PLAT244_ALERT_4_C | Low 'Solvent' Ueq as Compared to Neighbors of    | N3             | Check        |
| PLAT360_ALERT_2_C | Short C(sp3)-C(sp3) Bond C17 - C18 .             | 1.43           | Ang.         |
| PLAT767_ALERT_4_C | INS Embedded LIST 6 Instruction Should be LIST 4 | Please         | Check        |
| PLAT906_ALERT_3_C | Large K Value in the Analysis of Variance .....  | 8.695          | Check        |
| PLAT906_ALERT_3_C | Large K Value in the Analysis of Variance .....  | 2.326          | Check        |
| PLAT911_ALERT_3_C | Missing FCF Refl Between Thmin & STh/L= 0.600    | 10             | Report       |
|                   | 2 2 0, 0 0 2, 0 0 4, 16 9 6, 12 11 6, 19 0 10,   |                |              |
|                   | 18 0 12, 0 16 12, 0 16 13, 1 17 13,              |                |              |
| PLAT971_ALERT_2_C | Check Calcd Resid. Dens. 0.80Ang From C17        | 1.96           | eA-3         |
| PLAT971_ALERT_2_C | Check Calcd Resid. Dens. 0.71Ang From C17        | 1.59           | eA-3         |
| PLAT976_ALERT_2_C | Check Calcd Resid. Dens. 0.96Ang From O10 .      | -0.44          | eA-3         |
| PLAT977_ALERT_2_C | Check Negative Difference Density on H9B .       | -0.37          | eA-3         |
| PLAT977_ALERT_2_C | Check Negative Difference Density on H10B .      | -0.31          | eA-3         |

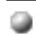

### Alert level G

FORMU01\_ALERT\_1\_G There is a discrepancy between the atom counts in the  
\_chemical\_formula\_sum and \_chemical\_formula\_moiety. This is  
usually due to the moiety formula being in the wrong format.  
Atom count from \_chemical\_formula\_sum: C28 H45 N3 Ni2 O10 S4  
Atom count from \_chemical\_formula\_moiety: C28 H44 N3 Ni2 O10 S4

FORMU01\_ALERT\_2\_G There is a discrepancy between the atom counts in the  
\_chemical\_formula\_sum and the formula from the \_atom\_site\* data.  
Atom count from \_chemical\_formula\_sum: C28 H45 N3 Ni2 O10 S4  
Atom count from the \_atom\_site data: C28 H44 N3 Ni2 O10 S4

CELLZ01\_ALERT\_1\_G Difference between formula and atom\_site contents detected.

CELLZ01\_ALERT\_1\_G WARNING: H atoms missing from atom site list. Is this intentional?  
From the CIF: \_cell\_formula\_units\_Z 8  
From the CIF: \_chemical\_formula\_sum C28 H45 N3 Ni2 O10 S4  
TEST: Compare cell contents of formula and atom\_site data

|      |           |           |      |
|------|-----------|-----------|------|
| atom | Z*formula | cif sites | diff |
| C    | 224.00    | 224.00    | 0.00 |
| H    | 360.00    | 352.00    | 8.00 |
| N    | 24.00     | 24.00     | 0.00 |
| Ni   | 16.00     | 16.00     | 0.00 |
| O    | 80.00     | 80.00     | 0.00 |
| S    | 32.00     | 32.00     | 0.00 |

|                   |                                                  |   |        |
|-------------------|--------------------------------------------------|---|--------|
| PLAT003_ALERT_2_G | Number of Uiso or Uij Restrained non-H Atoms ... | 5 | Report |
| PLAT004_ALERT_5_G | Polymeric Structure Found with Maximum Dimension | 2 | Info   |

|                   |                                                            |         |             |
|-------------------|------------------------------------------------------------|---------|-------------|
| PLAT007_ALERT_5_G | Number of Unrefined Donor-H Atoms .....                    | 10      | Report      |
|                   | H9A H9B H10A H10B H1A H1B H2A H2B H3A H3B                  |         |             |
| PLAT083_ALERT_2_G | SHELXL Second Parameter in WGHT Unusually Large            | 24.10   | Why ?       |
| PLAT143_ALERT_4_G | s.u. on c - Axis Small or Missing .....                    | 0.00010 | Ang.        |
| PLAT186_ALERT_4_G | The CIF-Embedded .res File Contains ISOR Records           | 2       | Report      |
| PLAT199_ALERT_1_G | Reported _cell_measurement_temperature ..... (K)           | 293     | Check       |
| PLAT200_ALERT_1_G | Reported _diffn_ambient_temperature ..... (K)              | 293     | Check       |
| PLAT720_ALERT_4_G | Number of Unusual/Non-Standard Labels .....                | 2       | Note        |
|                   | Ni02 C00L                                                  |         |             |
| PLAT794_ALERT_5_G | Tentative Bond Valency for Ni1 (II) .                      | 1.97    | Info        |
| PLAT794_ALERT_5_G | Tentative Bond Valency for Ni02 (III) .                    | 3.00    | Info        |
| PLAT794_ALERT_5_G | Tentative Bond Valency for Ni2 (III) .                     | 2.95    | Info        |
| PLAT860_ALERT_3_G | Number of Least-Squares Restraints .....                   | 30      | Note        |
| PLAT883_ALERT_1_G | No Info/Value for _atom_sites_solution_primary .           |         | Please Do ! |
| PLAT912_ALERT_4_G | Missing # of FCF Reflections Above STh/L= 0.600            | 147     | Note        |
| PLAT913_ALERT_3_G | Missing # of Very Strong Reflections in FCF ....           | 1       | Note        |
|                   | 0 0 4,                                                     |         |             |
| PLAT933_ALERT_2_G | Number of HKL-OMIT Records in Embedded .res File           | 6       | Note        |
|                   | 12 11 6, 25 9 0, 25 9 1, 16 9 6, 19 19 0, 19 1 13,         |         |             |
| PLAT941_ALERT_3_G | Average HKL Measurement Multiplicity .....                 | 4.6     | Low         |
| PLAT969_ALERT_5_G | The 'Henn et al.' R-Factor-gap value .....                 | 5.54    | Note        |
|                   | Predicted wR2: Based on SigI**2 2.95 or SHELX Weight 15.99 |         |             |
| PLAT978_ALERT_2_G | Number C-C Bonds with Positive Residual Density.           | 5       | Info        |

---

0 **ALERT level A** = Most likely a serious problem - resolve or explain  
 0 **ALERT level B** = A potentially serious problem, consider carefully  
 19 **ALERT level C** = Check. Ensure it is not caused by an omission or oversight  
 24 **ALERT level G** = General information/check it is not something unexpected

12 ALERT type 1 CIF construction/syntax error, inconsistent or missing data  
 12 ALERT type 2 Indicator that the structure model may be wrong or deficient  
 6 ALERT type 3 Indicator that the structure quality may be low  
 7 ALERT type 4 Improvement, methodology, query or suggestion  
 6 ALERT type 5 Informative message, check

---

It is advisable to attempt to resolve as many as possible of the alerts in all categories. Often the minor alerts point to easily fixed oversights, errors and omissions in your CIF or refinement strategy, so attention to these fine details can be worthwhile. In order to resolve some of the more serious problems it may be necessary to carry out additional measurements or structure refinements. However, the purpose of your study may justify the reported deviations and the more serious of these should normally be commented upon in the discussion or experimental section of a paper or in the "special\_details" fields of the CIF. checkCIF was carefully designed to identify outliers and unusual parameters, but every test has its limitations and alerts that are not important in a particular case may appear. Conversely, the absence of alerts does not guarantee there are no aspects of the results needing attention. It is up to the individual to critically assess their own results and, if necessary, seek expert advice.

### **Publication of your CIF in IUCr journals**

A basic structural check has been run on your CIF. These basic checks will be run on all CIFs submitted for publication in IUCr journals (*Acta Crystallographica*, *Journal of Applied Crystallography*, *Journal of Synchrotron Radiation*); however, if you intend to submit to *Acta Crystallographica Section C* or *E* or *IUCrData*, you should make sure that full publication checks are run on the final version of your CIF prior to submission.

### **Publication of your CIF in other journals**

Please refer to the *Notes for Authors* of the relevant journal for any special instructions relating to CIF submission.

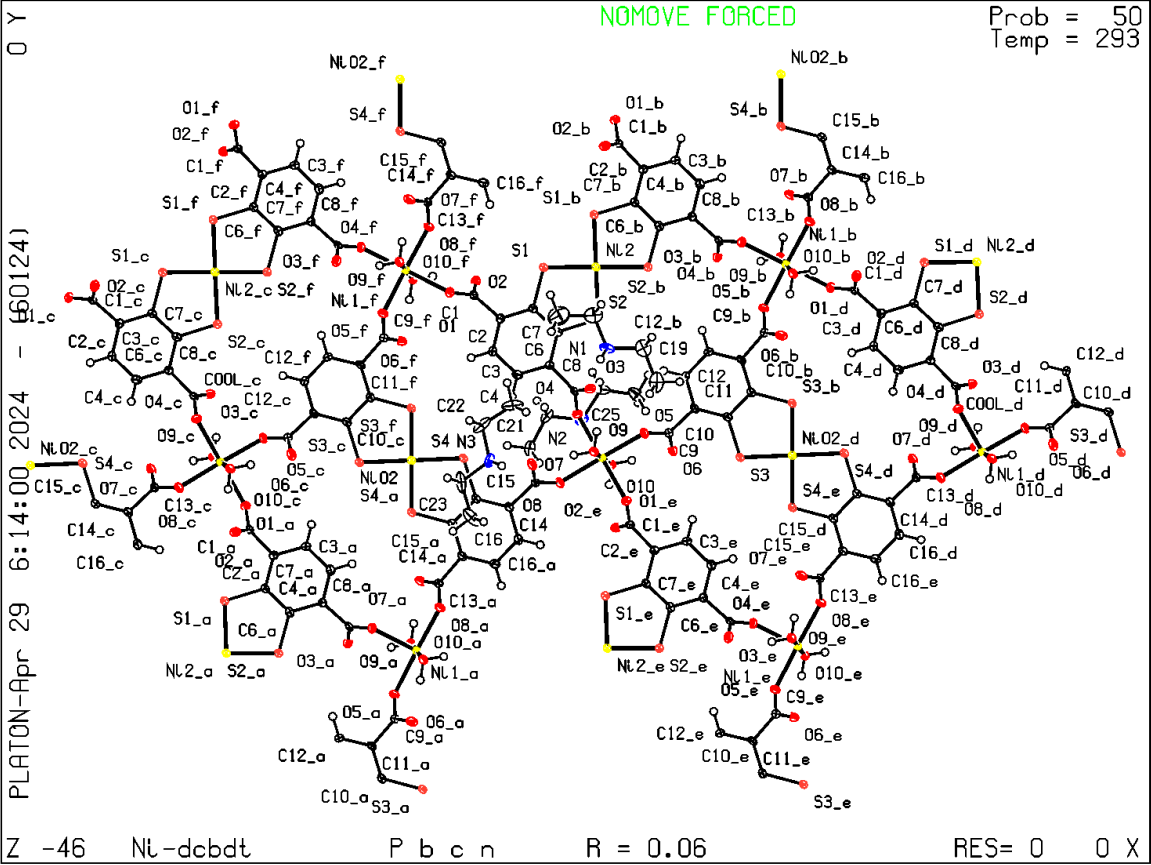

Supplement: d4cc02282c1.zip [file d4cc02282c1.zip]
