# Supplementary material for: 2D metal–organic frameworks bearing butterfly-shaped metal-bis(dithiolene) linkers from dithiol-functionalized benzenedicarboxylic acid
Source: Royal Society of Chemistry journal article supplement (doi:10.1039/d4cc02282c), 2024-01-01

## checkCIF/PLATON report

Structure factors have been supplied for datablock(s) Fe-dcbdt

THIS REPORT IS FOR GUIDANCE ONLY. IF USED AS PART OF A REVIEW PROCEDURE FOR PUBLICATION, IT SHOULD NOT REPLACE THE EXPERTISE OF AN EXPERIENCED CRYSTALLOGRAPHIC REFEREE.

No syntax errors found.      CIF dictionary      Interpreting this report

### Datablock: Fe-dcbdt

---

|                        |                                          |                                          |                          |
|------------------------|------------------------------------------|------------------------------------------|--------------------------|
| Bond precision:        | C-C = 0.0038 A                           | Wavelength=1.54184                       |                          |
| Cell:                  | a=22.2191(2)<br>alpha=90                 | b=22.6288(2)<br>beta=90                  | c=14.4544(1)<br>gamma=90 |
| Temperature:           | 302 K                                    |                                          |                          |
|                        | Calculated                               | Reported                                 |                          |
| Volume                 | 7267.55(11)                              | 7267.55(10)                              |                          |
| Space group            | P b c n                                  | P b c n                                  |                          |
| Hall group             | -P 2n 2ab                                | -P 2n 2ab                                |                          |
| Moiety formula         | C16 H8 Fe2 O10 S4, 2(C4 H12 N), C4 H11 N | C16 H8 Fe2 O10 S4, 2(C4 H12 N), C4 H11 N |                          |
| Sum formula            | C28 H43 Fe2 N3 O10 S4                    | C28 H43 Fe2 N3 O10 S4                    |                          |
| Mr                     | 821.59                                   | 821.59                                   |                          |
| Dx, g cm <sup>-3</sup> | 1.502                                    | 1.502                                    |                          |
| Z                      | 8                                        | 8                                        |                          |
| Mu (mm <sup>-1</sup> ) | 9.025                                    | 9.025                                    |                          |
| F000                   | 3424.0                                   | 3424.0                                   |                          |
| F000'                  | 3425.53                                  |                                          |                          |
| h,k,lmax               | 28,28,18                                 | 28,28,17                                 |                          |
| Nref                   | 7747                                     | 7482                                     |                          |
| Tmin,Tmax              |                                          | 0.525,1.000                              |                          |
| Tmin'                  |                                          |                                          |                          |

Correction method= # Reported T Limits: Tmin=0.525 Tmax=1.000  
AbsCorr = NONE

Data completeness= 0.966      Theta(max)= 77.571

R(reflections)= 0.0348( 6112)

wR2(reflections)=  
0.1093( 7482)

S = 1.042

Npar= 434



---

The following ALERTS were generated. Each ALERT has the format

**test-name\_ALERT\_alert-type\_alert-level.**

Click on the hyperlinks for more details of the test.

---

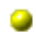

### Alert level C

|                   |                                                  |                  |
|-------------------|--------------------------------------------------|------------------|
| PLAT053_ALERT_1_C | Minimum Crystal Dimension Missing (or Error) ... | Please Check     |
| PLAT054_ALERT_1_C | Medium Crystal Dimension Missing (or Error) ...  | Please Check     |
| PLAT055_ALERT_1_C | Maximum Crystal Dimension Missing (or Error) ... | Please Check     |
| PLAT244_ALERT_4_C | Low 'Solvent' Ueq as Compared to Neighbors of    | N00I Check       |
| PLAT244_ALERT_4_C | Low 'Solvent' Ueq as Compared to Neighbors of    | N00J Check       |
| PLAT244_ALERT_4_C | Low 'Solvent' Ueq as Compared to Neighbors of    | N00Y Check       |
| PLAT260_ALERT_2_C | Large Average Ueq of Residue Including           | N00J 0.107 Check |
| PLAT260_ALERT_2_C | Large Average Ueq of Residue Including           | N00Y 0.103 Check |
| PLAT911_ALERT_3_C | Missing FCF Refl Between Thmin & STh/L= 0.600    | 40 Report        |
|                   | 0 2 0, 0 4 0, 0 6 0, 0 8 0, 7 9 0, 8 10 0,       |                  |
|                   | 0 4 1, 8 9 1, 8 10 1, 9 10 1, 8 11 1, 8 9 2,     |                  |
|                   | 9 9 2, 8 10 2, 9 10 2, 8 11 2, 7 8 3, 8 9 3,     |                  |
|                   | 9 9 3, 8 10 3, 9 10 3, 0 0 6, 1 0 6, 23 10 6,    |                  |
|                   | 22 11 6, 0 0 8, 1 0 8, 2 0 8, 3 0 8, 4 0 8,      |                  |
|                   | 5 0 8, 6 0 8, 1 1 8, 2 1 8, 3 1 8, 4 1 8,        |                  |
|                   | 5 1 8, 6 1 8, 0 2 8, 1 2 8,                      |                  |

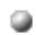

### Alert level G

|                   |                                                            |              |
|-------------------|------------------------------------------------------------|--------------|
| PLAT004_ALERT_5_G | Polymeric Structure Found with Maximum Dimension           | 2 Info       |
| PLAT007_ALERT_5_G | Number of Unrefined Donor-H Atoms .....                    | 9 Report     |
|                   | H00A H00B H00C H00D H00E H00F H00G H00H H00Y               |              |
| PLAT142_ALERT_4_G | s.u. on b - Axis Small or Missing .....                    | 0.00020 Ang. |
| PLAT143_ALERT_4_G | s.u. on c - Axis Small or Missing .....                    | 0.00010 Ang. |
| PLAT232_ALERT_2_G | Hirshfeld Test Diff (M-X) Fe01 --O008 .                    | 7.4 s.u.     |
| PLAT720_ALERT_4_G | Number of Unusual/Non-Standard Labels .....                | 90 Note      |
|                   | Fe01 Fe02 Fe03 S004 S005 S006 S007 O008                    |              |
|                   | H00A H00B O009 H00C H00D O00A O00B O00C                    |              |
|                   | O00D O00E O00F O00G O00H N00I H00E H00F                    |              |
|                   | N00J H00G H00H C00K C00L C00M C00N C00O                    |              |
|                   | C00P C00Q C00R C00S C00T C00U C00V C00W                    |              |
|                   | H00W C00X H00X N00Y H00Y C00Z H00Z C010                    |              |
|                   | H010 C011 H01A H01B C012 H01C H01D C013                    |              |
|                   | H01E H01F H01G C014 H01H H01I H01J C015                    |              |
|                   | H01K H01L C016 H01U H01V C017 H01M H01N                    |              |
|                   | C018 H01W H01X C019 H01O H01P H01Q C01A                    |              |
|                   | H01R H01S H01T C01B H01Y Ha C01C H01Z                      |              |
|                   | Hb Hc                                                      |              |
| PLAT794_ALERT_5_G | Tentative Bond Valency for Fe01 (II) .                     | 2.02 Info    |
| PLAT794_ALERT_5_G | Tentative Bond Valency for Fe02 (III) .                    | 3.49 Info    |
| PLAT794_ALERT_5_G | Tentative Bond Valency for Fe03 (III) .                    | 3.52 Info    |
| PLAT883_ALERT_1_G | No Info/Value for _atom_sites_solution_primary .           | Please Do !  |
| PLAT912_ALERT_4_G | Missing # of FCF Reflections Above STh/L= 0.600            | 200 Note     |
| PLAT969_ALERT_5_G | The 'Henn et al.' R-Factor-gap value .....                 | 3.87 Note    |
|                   | Predicted wR2: Based on SigI**2 2.83 or SHELX Weight 10.81 |              |
| PLAT978_ALERT_2_G | Number C-C Bonds with Positive Residual Density.           | 6 Info       |
| PLAT992_ALERT_5_G | Repd & Actual _reflns_number_gt Values Differ by           | 7 Check      |

---

0 **ALERT level A** = Most likely a serious problem - resolve or explain



0 **ALERT level B** = A potentially serious problem, consider carefully  
9 **ALERT level C** = Check. Ensure it is not caused by an omission or oversight  
14 **ALERT level G** = General information/check it is not something unexpected

4 ALERT type 1 CIF construction/syntax error, inconsistent or missing data  
4 ALERT type 2 Indicator that the structure model may be wrong or deficient  
1 ALERT type 3 Indicator that the structure quality may be low  
7 ALERT type 4 Improvement, methodology, query or suggestion  
7 ALERT type 5 Informative message, check

---

It is advisable to attempt to resolve as many as possible of the alerts in all categories. Often the minor alerts point to easily fixed oversights, errors and omissions in your CIF or refinement strategy, so attention to these fine details can be worthwhile. In order to resolve some of the more serious problems it may be necessary to carry out additional measurements or structure refinements. However, the purpose of your study may justify the reported deviations and the more serious of these should normally be commented upon in the discussion or experimental section of a paper or in the "special\_details" fields of the CIF. checkCIF was carefully designed to identify outliers and unusual parameters, but every test has its limitations and alerts that are not important in a particular case may appear. Conversely, the absence of alerts does not guarantee there are no aspects of the results needing attention. It is up to the individual to critically assess their own results and, if necessary, seek expert advice.

### **Publication of your CIF in IUCr journals**

A basic structural check has been run on your CIF. These basic checks will be run on all CIFs submitted for publication in IUCr journals (*Acta Crystallographica*, *Journal of Applied Crystallography*, *Journal of Synchrotron Radiation*); however, if you intend to submit to *Acta Crystallographica Section C* or *E* or *IUCrData*, you should make sure that full publication checks are run on the final version of your CIF prior to submission.

### **Publication of your CIF in other journals**

Please refer to the *Notes for Authors* of the relevant journal for any special instructions relating to CIF submission.

---



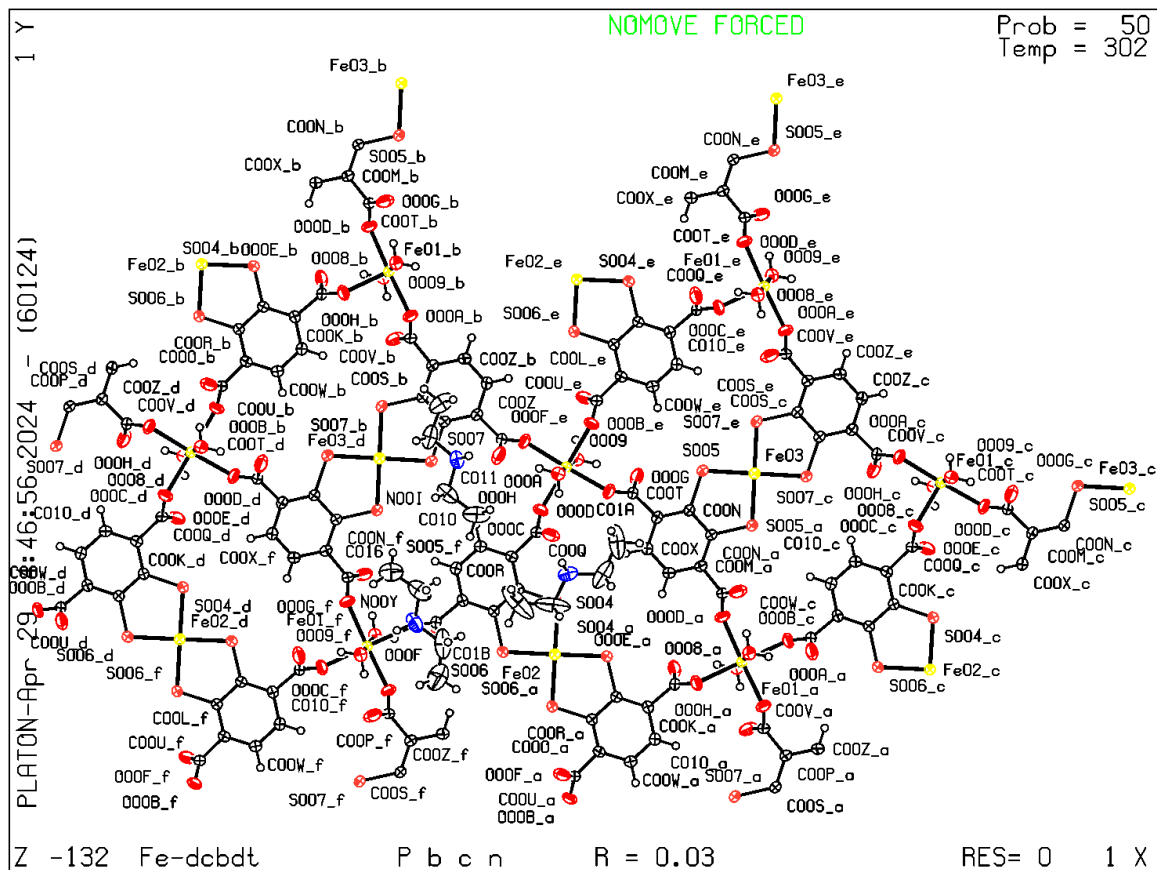

Supplement: d4cc02282c1.zip [file d4cc02282c1.zip]
