# Supplementary material for: 2D metal–organic frameworks bearing butterfly-shaped metal-bis(dithiolene) linkers from dithiol-functionalized benzenedicarboxylic acid
Source: Royal Society of Chemistry journal article supplement (doi:10.1039/d4cc02282c), 2024-01-01

## checkCIF/PLATON report

Structure factors have been supplied for datablock(s) Co-dcbdt

THIS REPORT IS FOR GUIDANCE ONLY. IF USED AS PART OF A REVIEW PROCEDURE FOR PUBLICATION, IT SHOULD NOT REPLACE THE EXPERTISE OF AN EXPERIENCED CRYSTALLOGRAPHIC REFEREE.

No syntax errors found.      CIF dictionary      Interpreting this report

### Datablock: Co-dcbdt

---

|                        |                                 |                                 |                           |
|------------------------|---------------------------------|---------------------------------|---------------------------|
| Bond precision:        | C-C = 0.0064 Å                  | Wavelength=1.54184              |                           |
| Cell:                  | a=22.1038 (3)<br>alpha=90       | b=22.5058 (3)<br>beta=90        | c=14.2421 (2)<br>gamma=90 |
| Temperature:           | 150 K                           |                                 |                           |
|                        | Calculated                      | Reported                        |                           |
| Volume                 | 7084.93 (17)                    | 7084.93 (17)                    |                           |
| Space group            | P b c n                         | P b c n                         |                           |
| Hall group             | -P 2n 2ab                       | -P 2n 2ab                       |                           |
| Moiety formula         | C16 H8 Co2 O10 S4, 3 (C4 H10 O) | C16 H8 Co2 O10 S4, 3 (C4 H10 O) |                           |
| Sum formula            | C28 H38 Co2 O13 S4              | C28 H38 Co2 O13 S4              |                           |
| Mr                     | 828.68                          | 828.68                          |                           |
| Dx, g cm <sup>-3</sup> | 1.554                           | 1.554                           |                           |
| Z                      | 8                               | 8                               |                           |
| Mu (mm <sup>-1</sup> ) | 10.069                          | 10.069                          |                           |
| F000                   | 3424.0                          | 3424.0                          |                           |
| F000'                  | 3406.51                         |                                 |                           |
| h, k, lmax             | 27, 28, 18                      | 27, 28, 17                      |                           |
| Nref                   | 7520                            | 7316                            |                           |
| Tmin, Tmax             |                                 | 0.188, 1.000                    |                           |
| Tmin'                  |                                 |                                 |                           |

Correction method= # Reported T Limits: Tmin=0.188 Tmax=1.000  
AbsCorr = ?

Data completeness= 0.973      Theta(max)= 77.409

R(reflections)= 0.0906 ( 5542)

wR2(reflections)=  
0.2776 ( 7316)

S = 1.070

Npar= 433

---

The following ALERTS were generated. Each ALERT has the format

**test-name\_ALERT\_alert-type\_alert-level.**

Click on the hyperlinks for more details of the test.

---

### Alert level B

|                   |                           |     |                     |   |             |
|-------------------|---------------------------|-----|---------------------|---|-------------|
| PLAT430_ALERT_2_B | Short Inter D...A Contact | O2  | ..O13               | . | 2.73 Ang.   |
|                   |                           |     | x,y,z =             |   | 1_555 Check |
| PLAT430_ALERT_2_B | Short Inter D...A Contact | O5  | ..O11               | . | 2.75 Ang.   |
|                   |                           |     | x,y,z =             |   | 1_555 Check |
| PLAT430_ALERT_2_B | Short Inter D...A Contact | O6  | ..O13               | . | 2.80 Ang.   |
|                   |                           |     | x,1-y,-1/2+z =      |   | 7_565 Check |
| PLAT430_ALERT_2_B | Short Inter D...A Contact | O7  | ..O10               | . | 2.84 Ang.   |
|                   |                           |     | x,1-y,1/2+z =       |   | 7_566 Check |
| PLAT430_ALERT_2_B | Short Inter D...A Contact | O11 | ..O12               | . | 2.84 Ang.   |
|                   |                           |     | 3/2-x,3/2-y,1/2+z = |   | 2_665 Check |

---

### Alert level C

RINTA01\_ALERT\_3\_C The value of Rint is greater than 0.12

Rint given 0.167

|                   |                                                  |         |              |
|-------------------|--------------------------------------------------|---------|--------------|
| PLAT020_ALERT_3_C | The Value of Rint is Greater Than 0.12 .....     | 0.167   | Report       |
| PLAT052_ALERT_1_C | Info on Absorption Correction Method Not Given   |         | Please Do !  |
| PLAT053_ALERT_1_C | Minimum Crystal Dimension Missing (or Error) ... |         | Please Check |
| PLAT054_ALERT_1_C | Medium Crystal Dimension Missing (or Error) ...  |         | Please Check |
| PLAT055_ALERT_1_C | Maximum Crystal Dimension Missing (or Error) ... |         | Please Check |
| PLAT084_ALERT_3_C | High wR2 Value (i.e. > 0.25) .....               | 0.28    | Report       |
| PLAT213_ALERT_2_C | Atom Col has ADP max/min Ratio .....             | 3.1     | prolat       |
| PLAT243_ALERT_4_C | High 'Solvent' Ueq as Compared to Neighbors of   | C19     | Check        |
| PLAT244_ALERT_4_C | Low 'Solvent' Ueq as Compared to Neighbors of    | O13     | Check        |
| PLAT250_ALERT_2_C | Large U3/U1 Ratio for <U(i,j)> Tensor(Resd 1)    | 2.2     | Note         |
| PLAT341_ALERT_3_C | Low Bond Precision on C-C Bonds .....            | 0.00642 | Ang.         |
| PLAT906_ALERT_3_C | Large K Value in the Analysis of Variance .....  | 2.915   | Check        |
| PLAT911_ALERT_3_C | Missing FCF Refl Between Thmin & STh/L= 0.600    | 5       | Report       |
|                   | 0 0 2, 0 0 4, 23 10 4, 22 11 4, 23 11 4,         |         |              |
| PLAT971_ALERT_2_C | Check Calcd Resid. Dens. 1.19Ang From Co1        | 1.58    | eA-3         |
| PLAT972_ALERT_2_C | Check Calcd Resid. Dens. 0.93Ang From Co3        | -2.37   | eA-3         |
| PLAT972_ALERT_2_C | Check Calcd Resid. Dens. 1.06Ang From Co1        | -2.24   | eA-3         |
| PLAT972_ALERT_2_C | Check Calcd Resid. Dens. 0.91Ang From Co2        | -2.17   | eA-3         |
| PLAT972_ALERT_2_C | Check Calcd Resid. Dens. 1.02Ang From Co1        | -2.14   | eA-3         |
| PLAT977_ALERT_2_C | Check Negative Difference Density on H8B .       | -0.66   | eA-3         |
| PLAT977_ALERT_2_C | Check Negative Difference Density on H19B .      | -0.33   | eA-3         |

---

### Alert level G

|                   |                                                  |      |        |
|-------------------|--------------------------------------------------|------|--------|
| PLAT003_ALERT_2_G | Number of Uiso or Uij Restrained non-H Atoms ... | 32   | Report |
| PLAT004_ALERT_5_G | Polymeric Structure Found with Maximum Dimension | 2    | Info   |
| PLAT007_ALERT_5_G | Number of Unrefined Donor-H Atoms .....          | 4    | Report |
|                   | H8A H8B H9A H9B                                  |      |        |
| PLAT072_ALERT_2_G | SHELXL First Parameter in WGHT Unusually Large   | 0.20 | Report |
| PLAT186_ALERT_4_G | The CIF-Embedded .res File Contains ISOR Records | 3    | Report |
| PLAT794_ALERT_5_G | Tentative Bond Valency for Co1 (II) .            | 1.97 | Info   |
| PLAT794_ALERT_5_G | Tentative Bond Valency for Co2 (II) .            | 2.17 | Info   |
| PLAT794_ALERT_5_G | Tentative Bond Valency for Co3 (II) .            | 2.19 | Info   |
| PLAT860_ALERT_3_G | Number of Least-Squares Restraints .....         | 192  | Note   |

|                                                                    |                      |       |      |
|--------------------------------------------------------------------|----------------------|-------|------|
| PLAT912_ALERT_4_G Missing # of FCF Reflections Above STh/L=        | 0.600                | 195   | Note |
| PLAT913_ALERT_3_G Missing # of Very Strong Reflections in FCF .... |                      | 1     | Note |
| 0 0 4,                                                             |                      |       |      |
| PLAT941_ALERT_3_G Average HKL Measurement Multiplicity .....       |                      | 4.9   | Low  |
| PLAT969_ALERT_5_G The 'Henn et al.' R-Factor-gap value .....       |                      | 2.83  | Note |
| Predicted wR2: Based on SigI**2                                    | 9.79 or SHELX Weight | 26.74 |      |
| PLAT978_ALERT_2_G Number C-C Bonds with Positive Residual Density. |                      | 0     | Info |

---

|    |                      |                                                              |
|----|----------------------|--------------------------------------------------------------|
| 0  | <b>ALERT level A</b> | = Most likely a serious problem - resolve or explain         |
| 5  | <b>ALERT level B</b> | = A potentially serious problem, consider carefully          |
| 21 | <b>ALERT level C</b> | = Check. Ensure it is not caused by an omission or oversight |
| 14 | <b>ALERT level G</b> | = General information/check it is not something unexpected   |
|    |                      |                                                              |
| 4  | ALERT type 1         | CIF construction/syntax error, inconsistent or missing data  |
| 17 | ALERT type 2         | Indicator that the structure model may be wrong or deficient |
| 9  | ALERT type 3         | Indicator that the structure quality may be low              |
| 4  | ALERT type 4         | Improvement, methodology, query or suggestion                |
| 6  | ALERT type 5         | Informative message, check                                   |

---

It is advisable to attempt to resolve as many as possible of the alerts in all categories. Often the minor alerts point to easily fixed oversights, errors and omissions in your CIF or refinement strategy, so attention to these fine details can be worthwhile. In order to resolve some of the more serious problems it may be necessary to carry out additional measurements or structure refinements. However, the purpose of your study may justify the reported deviations and the more serious of these should normally be commented upon in the discussion or experimental section of a paper or in the "special\_details" fields of the CIF. checkCIF was carefully designed to identify outliers and unusual parameters, but every test has its limitations and alerts that are not important in a particular case may appear. Conversely, the absence of alerts does not guarantee there are no aspects of the results needing attention. It is up to the individual to critically assess their own results and, if necessary, seek expert advice.

### Publication of your CIF in IUCr journals

A basic structural check has been run on your CIF. These basic checks will be run on all CIFs submitted for publication in IUCr journals (*Acta Crystallographica*, *Journal of Applied Crystallography*, *Journal of Synchrotron Radiation*); however, if you intend to submit to *Acta Crystallographica Section C* or *E* or *IUCrData*, you should make sure that full publication checks are run on the final version of your CIF prior to submission.

### Publication of your CIF in other journals

Please refer to the *Notes for Authors* of the relevant journal for any special instructions relating to CIF submission.

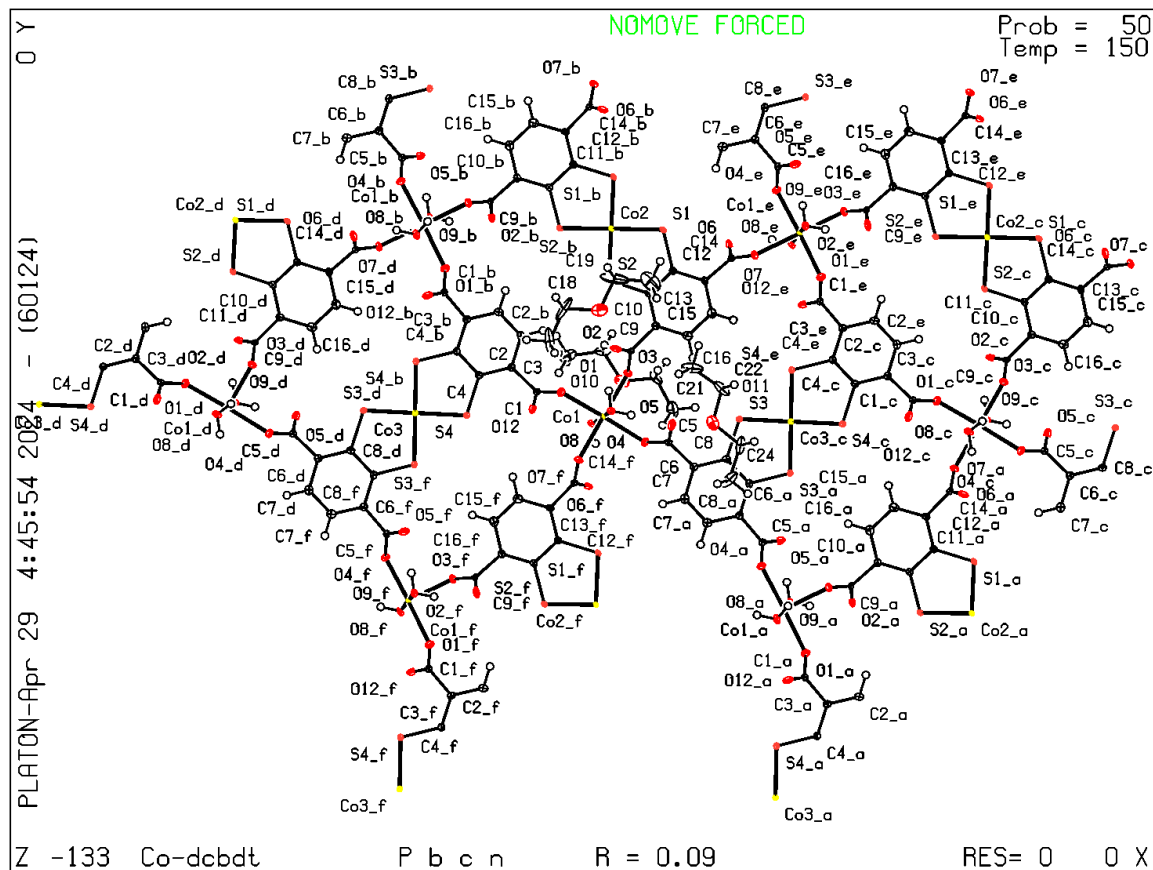

Supplement: d4cc02282c1.zip [file d4cc02282c1.zip]
